# Supplementary material for: Genetic Association and Altered Gene Expression of CYBB in Multiple Sclerosis Patients
Source: PubMed Central journal article supplement (PMC6315774; doi:10.3390/biomedicines6040117), 2018-12-18
Supplement: biomedicines-06-00117-s001.pdf [file biomedicines-06-00117-s001.pdf]

Article

# Genetic association and altered gene expression of *CYBB* in Multiple Sclerosis patients

Giulia Cardamone <sup>1</sup>, Elvezia Maria Paraboschi <sup>1</sup>, Giulia Soldà <sup>1,2</sup>, Stefano Duga <sup>1,2</sup>, Janna Saarela <sup>3</sup>, and Rosanna Asselta <sup>1,2\*</sup>

<sup>1</sup> Department of Biomedical Sciences, Humanitas University, Via Rita Levi Montalcini 4, 20090 Pieve Emanuele, Milan, Italy; E-Mails: rosanna.asselta@hunimed.eu (R.A.); giulia.cardamone@st.hunimed.eu (G.C.); elvezia\_maria.paraboschi@hunimed.eu (E.M.P.); giulia.solda@hunimed.eu (G.S.); stefano.duga@hunimed.eu (S.D.)

<sup>2</sup> Humanitas Clinical and Research Center, Via Manzoni 56, 20089 Rozzano, Milan, Italy; E-Mails: rosanna.asselta@hunimed.eu (R.A.); giulia.solda@hunimed.eu (G.S.); stefano.duga@hunimed.eu (S.D.)

<sup>3</sup> Institute for Molecular Medicine Finland, Helsinki Institute of Life Science (HiLIFE), University of Helsinki, Helsinki, 00290, Finland; E-Mail: janna.saarela@helsinki.fi (J.S.);

\* Correspondence: rosanna.asselta@hunimed.eu; Tel: +39-02-82245215

## Content:

**Supplementary Table 1.** NADPH polymorphisms selected for the association study.

**Supplementary Figure 1.** Sex-differential expression of *CYBB*.

**Table S1. NADPH polymorphisms selected for the association study.**

| <i>Gene (Chr)</i>      | <i>Protein</i> <sup>1</sup> | <i>Polymorphism</i> | <i>Function</i>                                        | <i>RefSeq</i>        | <i>Position</i> <sup>2</sup> |
|------------------------|-----------------------------|---------------------|--------------------------------------------------------|----------------------|------------------------------|
| <i>NCF1</i><br>(Chr7)  | p47-phox                    | CA repeat           | microsatellite mapping 61 kb from the TSS              | AFMA060XC9 (D7S1870) | 74,126,556 - 74,126,902      |
|                        |                             | CA repeat           | microsatellite mapping 1,190 kb 3' to <i>NCF1</i>      | AFMC019YG9 (D7S2518) | 75,377,845 - 75,378,207      |
| <i>NCF2</i><br>(Chr1)  | p67-phox                    | A>C                 | 3' UTR variant                                         | rs796860             | 183,524,855                  |
|                        |                             | G>T                 | Intron 14                                              | <u>rs699244</u>      | 183,525,452                  |
|                        |                             | T>C                 | Intron 9                                               | rs2296164            | 183,534,935                  |
|                        |                             | T>G                 | Intron 4                                               | rs3818364            | 183,542,747                  |
|                        |                             | A>G                 | Intron 1                                               | rs789192             | 183,556,291                  |
|                        |                             | A>C                 | 5' UTR variant                                         | rs2274065            | 183,559,704                  |
| <i>NCF4</i><br>(Chr22) | p40-phox                    | G>A                 | -184 nt from TSS                                       | rs1883112            | 37,256,846                   |
|                        |                             | G>A                 | Intron 1                                               | rs741999             | 37,259,273                   |
|                        |                             | G>A                 | Intron 2                                               | rs909484             | 37,260,601                   |
|                        |                             | G>A                 | Intron 5                                               | rs2072706            | 37,266,979                   |
|                        |                             | C>T                 | Intron 8 <sup>3</sup>                                  | rs2075939            | 37,271,882                   |
|                        |                             | C>T                 | Exon 10, silent                                        | rs1858               | 37,273,805                   |
| <i>CYBA</i><br>(Chr16) | p22-phox                    | G>A                 | 3' UTR                                                 | rs1049255            | 88,709,737                   |
|                        |                             | C>T                 | Exon 6, Ala>Val                                        | rs1049254            | 88,709,828                   |
|                        |                             | C>T                 | Exon 4, His>Tyr                                        | rs4673               | 88,713,236                   |
|                        |                             | C>T                 | Intron 1                                               | rs2306422            | 88,714,559                   |
|                        |                             | G>A                 | 5' UTR                                                 | rs8854               | 88,718,865                   |
|                        |                             | G>A                 | 4.51 kb from the TSS (intronic in the <i>MVD</i> gene) | rs3736112            | 88,722,012                   |
| <i>CYBB</i><br>(ChrX)  | gp91-phox                   | G>C                 | Intron 5                                               | rs3935493            | 37,654,360                   |
|                        |                             | T>A                 | Intron 7                                               | rs5963310            | 37,659,562                   |
|                        |                             | G>A                 | 7 kb 3' to <i>CYBB</i>                                 | rs9330580            | 37,679,803                   |

Chr, chromosome; TSS, transcription start site; UTR, untranslated region; nt, nucleotide; minus sign indicates the number of nucleotides of the promoter region upstream of the main TSS.

<sup>1</sup> UniProtKB/Swiss-Prot nomenclature is used for protein names.

<sup>2</sup> Chromosomal position (bp) according to UCSC Genome Browser on Human Feb. 2009 (GRCh37/hg19) assembly.

<sup>3</sup> The rs2075939 polymorphism can also determine a Pro>Leu missense change in the case of the transcript variant NM\_013416.3 of the *NCF4* gene.

All polymorphisms were first tested for their polymorphic content by direct sequencing the relevant fragment in 32 healthy Finnish individuals; those resulted monomorphic are evidenced in gray, whereas the one showing three alleles (and hence not compatible with the genotype platform we used for genotyping) is evidenced in gray and it is underlined. These SNPs were not further analyzed.

In the examined population, the D7S1870 microsatellite showed alleles ranging from 12 to 25 CA repeats, whereas the D7S2518 marker from 3 to 14 CA repeats.

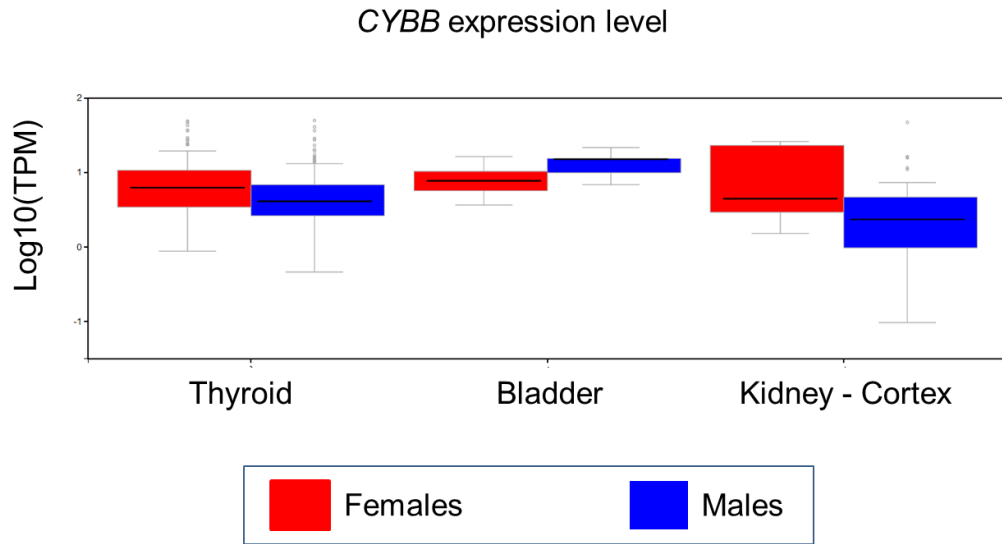

**Figure S1.** Sex-differential expression of *CYBB*. Data were retrieved from the GTEx repository (<https://www.gtexportal.org/home/>). Boxplots show the expression levels of the *CYBB* gene measured by RNAseq experiments in thyroid (153 females, 293 males), bladder (5 females, 6 males), and kidney cortex (9 females, 36 males). Expression values are shown in TPM (Transcripts per Million), calculated for a gene model with different isoforms collapsed to a single gene. No other normalization steps were applied. Box plots are shown with the median and 25% and 75% percentiles; points are displayed as outliers if above or below 1.5 times the interquartile range.
